# Supplementary material
Source: PubMed Central journal article supplement (PMC2952234)

Supplemental Fig. 1

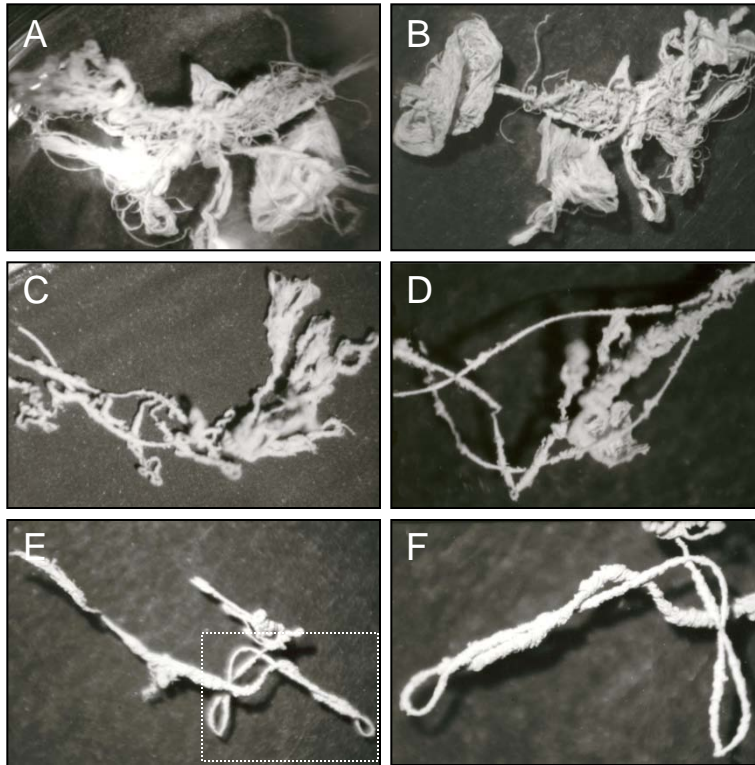

Supplemental Fig. 2

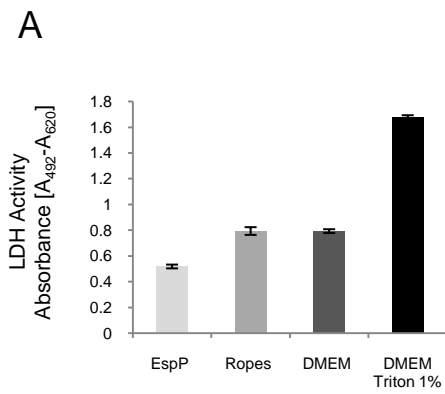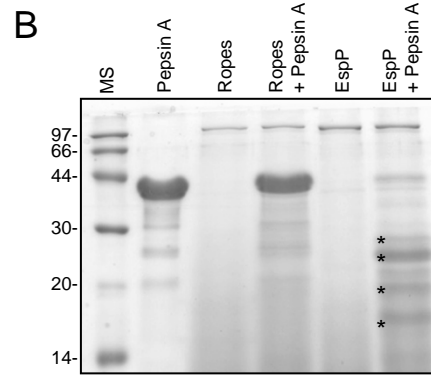

Supplemental Fig. 3

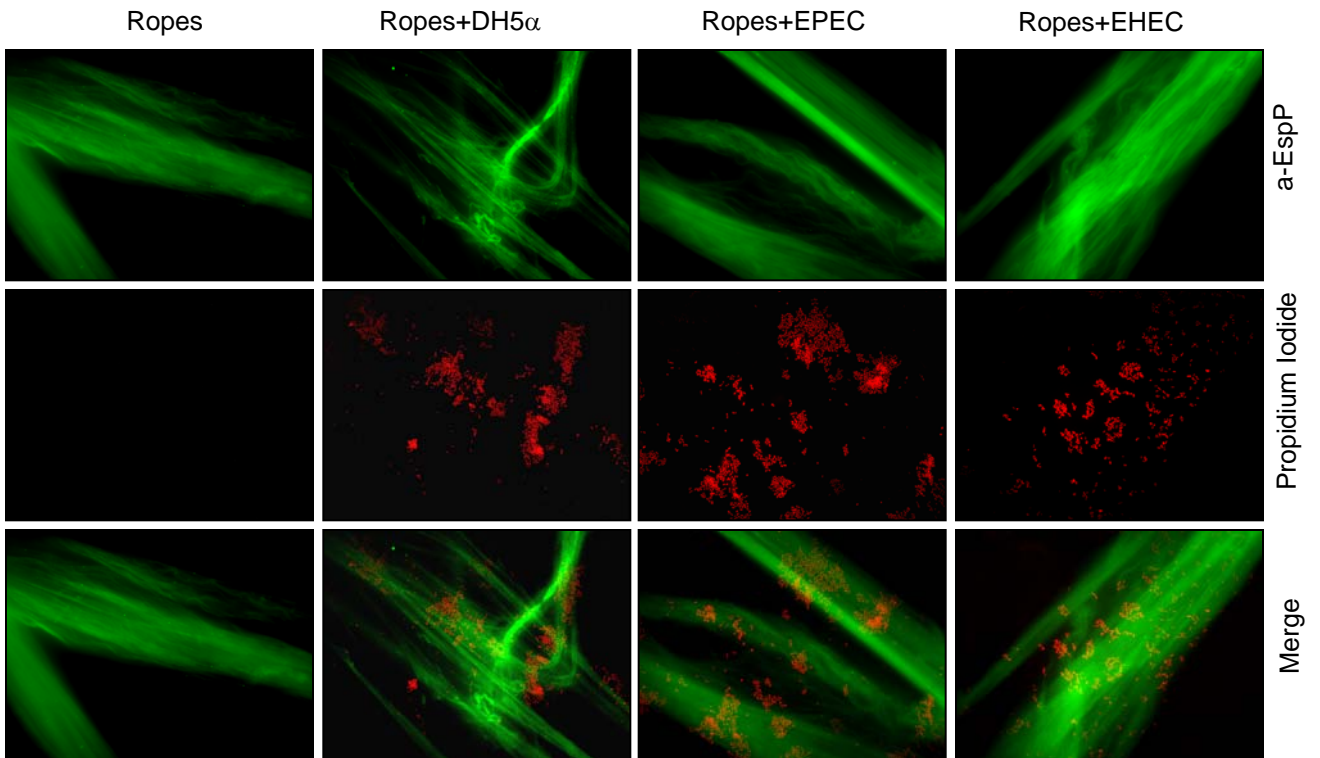

Supplement: supp_M110.162248_Figures.pdf [file supp_M110.162248_Figures.pdf]
